# Supplementary material for: Herb Robert’s Gift against Human Diseases: Anticancer and Antimicrobial Activity of Geranium robertianum L.
Source: MDPI journal article supplement (doi:10.3390/pharmaceutics15051561), 2023-05-22
Supplement: s1 [file s1]

## Supplementary Materials

### Article

# Herb Robert's gift against human diseases – anticancer and antimicrobial activity of *Geranium robertianum* L.

Łukasz Świątek <sup>1,\*</sup>, Inga Wasilewska <sup>2</sup>, Anastazja Boguszewska <sup>1</sup>, Agnieszka Grzegorzczuk <sup>3</sup>, Jakub Rezmer <sup>2</sup>, Barbara Rajtar <sup>1</sup>, Małgorzata Polz-Dacewicz <sup>1</sup> and Elwira Sieniawska <sup>4,\*</sup>

<sup>1</sup> Department of Virology with Viral Diagnostics Laboratory, Medical University of Lublin, Chodźki 1, 20-093 Lublin, Poland; anastazja.boguszewska@umlub.pl (A.B.); barbara.rajtar@umlub.pl (B.R.); malgorzata.polz-dacewicz@umlub.pl (M.P.-D.)

<sup>2</sup> Student Research Group, Department of Virology with Viral Diagnostics Laboratory, Medical University of Lublin, Chodźki 1, 20-093 Lublin, Poland; wasilewskainga@gmail.com (I.W.); jakubrezmer1@gmail.com (J.R.)

<sup>3</sup> Chair and Department of Pharmaceutical Microbiology, Medical University of Lublin, Chodźki 1, 20-093 Lublin, Poland; agnieszka.grzegorzczuk@umlub.pl

<sup>4</sup> Department of Natural Products Chemistry, Medical University of Lublin, Chodźki 1, 20-093 Lublin, Poland

\* Correspondence: lukasz.swiatek@umlub.pl (Ł.Ś.); esieniawska@pharmacognosy.org (E.S.)

### Content

#### I. Tables

#### II. Figures

#### III. Materials and methods

### I. Tables

Table S1. The yield of hexane fractions H1-H8

| Fraction | Amount of residue [g] |
|----------|-----------------------|
| H1       | 1.323                 |
| H2       | 0.507                 |
| H3       | 0.531                 |
| H4       | 0.47                  |
| H5       | 0.291                 |
| H6       | 0.131                 |
| H7       | 0.127                 |
| H8       | 0.132                 |

Table S2. The yield of ethyl acetate fractions E1-E6

| Fraction | Amount of residue [g] |
|----------|-----------------------|
| E1       | 1.29                  |
| E2       | 1.23                  |
| E3       | 0.58                  |
| E4       | 0.45                  |
| E5       | 0.51                  |
| E6       | 0.58                  |

Table S3. The phytochemical characteristics of *G. robertianum* extracts

| Comp. No | R time [min] | Tentative identification           | Molecular formula                               | Monoisotopic Mass | Pseudomolecular ion [M-H] <sup>-</sup> (m/z) | Fragment ions (m/z)                                                   | Extracts     |
|----------|--------------|------------------------------------|-------------------------------------------------|-------------------|----------------------------------------------|-----------------------------------------------------------------------|--------------|
| 1        | 2.04         | Quinic acid derivative             | -                                               | 534.1708          | 533.1708                                     | 191.0548, 173.0463                                                    | M            |
| 2        | 2.09         | Quinic acid                        | C <sub>7</sub> H <sub>12</sub> O <sub>6</sub>   | 192.0551          | 191.0551                                     | 173.0031, 111.0083, 93.0347, 85.0288                                  | M, Aq, H, EA |
| 3        | 2.33         | Malic acid                         | C <sub>4</sub> H <sub>6</sub> O <sub>5</sub>    | 134.0135          | 133.0135                                     | 114.9999, 71.0140                                                     | M, Aq, H, EA |
| 4        | 2.39         | Citric acid                        | C <sub>6</sub> H <sub>8</sub> O <sub>7</sub>    | 192.0236          | 191.0236                                     | 111.0081, 87.0089, 71.0127                                            | M, Aq, H, EA |
| 5        | 2.95         | Galloylglucose isomer I            | C <sub>13</sub> H <sub>16</sub> O <sub>10</sub> | 332.066           | 331.066                                      | 169.0123, 125.0230                                                    | M, Aq        |
| 6        | 2.98         | 3-O-Galloylquinic acid             | C <sub>14</sub> H <sub>16</sub> O <sub>10</sub> | 344.0653          | 343.0653                                     | 191.0546, 196.0120, 125.0241, 111.0418                                | M            |
| 7        | 4.11         | Gallic acid                        | C <sub>7</sub> H <sub>6</sub> O <sub>5</sub>    | 170.0139          | 169.0139                                     | 125.0239, 107.0115, 79.0191                                           | M, Aq        |
| 8        | 4.21         | 4-O-Galloylquinic acid             | C <sub>14</sub> H <sub>16</sub> O <sub>10</sub> | 344.0679          | 343.0679                                     | 191.0548, 173.0431, 169.0131, 151.0405, 125.0229, 85.0283             | M, Aq, H     |
| 9        | 6.24         | Dihydroxybenzoic acid glucoside    | C <sub>13</sub> H <sub>16</sub> O <sub>9</sub>  | 316.0700          | 315.0700                                     | 153.0199, 108.0209                                                    | M, Aq        |
| 10       | 7.33         | Dihydroxybenzoic acid              | C <sub>7</sub> H <sub>6</sub> O <sub>4</sub>    | 154.0182          | 153.0182                                     | 109.0291, 108.0298, 91.0187                                           | M, Aq, EA    |
| 11       | 8.86         | di-HHDP-glucose (Pedunculagin)     | C <sub>34</sub> H <sub>24</sub> O <sub>22</sub> | 784.0687          | 783.0687                                     | 481.0557, 300.9943, 275.0158, 249.0358                                | M, Aq        |
| 12       | 10.17        | Caffeoylquinic acid isomer I       | C <sub>16</sub> H <sub>18</sub> O <sub>9</sub>  | 354.0868          | 353.0868                                     | 191.0556, 179.0344, 161.0228, 135.0444                                | M, Aq, H, EA |
| 13       | 11.16        | Gallic acid O-(6-galloylglucoside) | C <sub>20</sub> H <sub>20</sub> O <sub>14</sub> | 484.0772          | 483.0772                                     | 423.0475, 331.0623; 313.0537; 271.04118; 169.0121; 151.0003, 125.0238 | M            |

|    |       |                                               |           |          |          |                                                                            |              |
|----|-------|-----------------------------------------------|-----------|----------|----------|----------------------------------------------------------------------------|--------------|
| 14 | 11.31 | Methylgallic acid                             | C8H8O5    | 184.0295 | 183.0295 | 168.0060, 124.0166, 78.0099                                                | M            |
| 15 | 11.34 | Dihydroxybenzoic acid<br>pentoside            | C12H14O8  | 286.0608 | 285.0608 | 225.0401, 153.0190, 108.0220                                               | M, Aq        |
| 16 | 11.40 | Galloylglucose isomer II                      | C13H16O10 | 332.0670 | 331.0670 | 169.0140, 125.0244                                                         | M, Aq        |
| 17 | 11.60 | p-Coumaroylquinic acid                        | C16H18O8  | 338.0804 | 337.0804 | 191.0534, 163.0376                                                         | M, Aq        |
| 18 | 13.60 | 4-O-feruloylquinic acid                       | C17H20O9  | 368.0917 | 367.0917 | 193.0468, 173.0419                                                         | M, Aq        |
| 19 | 13.83 | Caffeoylquinic acid isomer II                 | C16H18O9  | 354.0868 | 353.0868 | 191.0550, 179.0339, 173.0446,<br>135.0444                                  | M, Aq, H, EA |
| 20 | 15.03 | Gallic acid pentoside                         | C12H14O9  | 302.0476 | 301.0476 | 283.0384, 169.0090, 168.0018,<br>125.0246                                  | M, Aq        |
| 21 | 15.57 | Gallacetophenone                              | C8H8O4    | 168.0361 | 167.0361 | 123.0452, 108.0224                                                         | EA           |
| 22 | 15.59 | Castalin/Vescalin                             | C27H20O18 | 632.0568 | 631.0568 | 613.0454, 569.0471, 461.0362,<br>445.0386, 299.9862, 298.9837,<br>169.0148 | Aq           |
| 23 | 16.30 | Brevifolin                                    | C12H8O6   | 248.0201 | 247.0201 | 219.0257, 191.0313, 173.0214,<br>145.0267                                  | M, Aq, H, EA |
| 24 | 16.72 | Brevifolincarboxylic acid                     | C13H8O8   | 292.0141 | 291.0141 | 247.0230, 191.0341, 173.0246,<br>163.0399, 145.0295                        | M, Aq, H, EA |
| 25 | 17.12 | HDDP-galloyl-glucose<br>(Corilagin structure) | C27H22O18 | 634.0723 | 633.0723 | 300.9897, 275.0112, 245.0129,<br>169.0125                                  | M, Aq        |
| 26 | 17.97 | Ellagitannin                                  | -         | 816.0582 | 815.0582 | 797.0130, 753.0277, 725.0313,<br>475.0231 300.9909, 249.0346               | M            |
| 27 | 19.21 | Geraniin                                      | C41H28O27 | 952.0563 | 951.0563 | 933.0448, 915.0304, 463.0440,<br>300.9923, 169.0091                        | M, Aq, H     |

|    |       |                                         |           |          |          |                                                                                                |              |
|----|-------|-----------------------------------------|-----------|----------|----------|------------------------------------------------------------------------------------------------|--------------|
| 28 | 19.71 | Methyl brevifolincarboxylate            | C14H10O8  | 306.0304 | 305.0304 | 273.0033, 245.0084, 217.0137,<br>173.0210, 161.0239, 145.0279,<br>133.0269, 117.0326, 105.0329 | M            |
| 29 | 20.97 | 4-O-galloylchlorogenic acid             | C23H22O13 | 506.0507 | 505.0507 | 353.0538, 191.0374, 179.0173,<br>168.9952, 135.0315                                            | M, Aq, H     |
| 30 | 22.38 | Flavonoid derivative                    |           | 740.2087 | 739.2087 | 575.1357, 473.1003, 327.0465,<br>274.0292, 255.0242, 178.9957.<br>151.0033                     | Aq           |
| 31 | 22.39 | Tetragalloylglucose isomer              | C34H28O22 | 788.0811 | 787.0811 | 635.0021, 617.0193, 465.0292,<br>447.0157, 300.9686, 246.9985,<br>168.9956                     | M            |
| 32 | 22.40 | Caffeic acid derivative                 |           | 296.0080 | 295.0080 | 251.0155, 207.0260, 179.0309,<br>163.0370, 135.0433                                            | M, Aq        |
| 33 | 22.47 | Ellagic acid pentoside                  | C19H14O12 | 434.0420 | 433.0420 | 300.9688; 299.9590                                                                             | M            |
| 34 | 23.16 | Rutin                                   | C27H30O16 | 610.1321 | 609.1321 | 463.0792, 301.0277, 300.0212,<br>271.0186, 178.9955                                            | M, Aq, H     |
| 35 | 23.36 | Kaempferol-3-O- rutinoside              | C27H30O15 | 594.1525 | 593.1525 | 285.0137, 257.0148, 255.0101                                                                   | M, Aq, H     |
| 36 | 23.66 | Ellagic acid                            | C14H6O8   | 302.0025 | 301.0025 | 283.9679, 244.9839, 228.9909,<br>200.9985, 173.0067, 157.0131,<br>145.0145                     | M, Aq, H, EA |
| 37 | 23.94 | Ellagic acid hexoside                   | C20H16O13 | 464.0475 | 463.0475 | 300.9715                                                                                       | M, Aq, H     |
| 38 | 24.25 | HDDP-galloyl-glucose based<br>structure | C41H28O28 | 970.0838 | 969.0838 | 925.0539, 881.0645, 755.0491,<br>711.0612, 633.0522, 463.0409,<br>300.9915, 247.0202, 169.0120 | Aq           |
| 39 | 24.73 | Pentagalloylglucose isomer I            | C41H32O26 | 940.1109 | 939.1109 | 769.0298, 617.0333, 465.0149,<br>447.0233, 341.0305, 169.0014                                  | M            |
| 40 | 27.46 | Kaempferol-3-O- glucoside               | C21H20O11 | 448.0943 | 447.0943 | 285.0189, 284.0096, 255.0020,<br>150.9886                                                      | M, Aq        |

|    |       |                       |           |          |          |                                           |              |
|----|-------|-----------------------|-----------|----------|----------|-------------------------------------------|--------------|
| 41 | 30.06 | Fatty compound        | C12H24O2  | 200.1324 | 199.1324 | 125,0941                                  | H            |
| 42 | 30.92 | Quercetin             | C15H10O7  | 302.0291 | 301.0291 | 257.0401, 178.9959, 151.0023              | M, Aq, H, EA |
| 43 | 32.09 | Fatty compound        | C18H32O5  | 328.212  | 327.212  | -                                         | M, Aq, H, EA |
| 44 | 32.34 | Undecanedioic acid    | C11H20O4  | 216.1328 | 215.1328 | 153.1287, 197.1177                        | EA           |
| 45 | 33.68 | Fatty compound        | C18H34O5  | 330.234  | 329.0234 | -                                         | M, Aq, H, EA |
| 46 | 34.35 | Kaempferol            | C15H10O6  | 286.0401 | 285.0401 | 151.0033                                  | M, Aq, H, EA |
| 47 | 34.56 | Unidentified          | C7H6O5    | 170.0141 | 169.0141 | 125.0242, 151.0033                        | EA           |
| 48 | 34.61 | Kaempferol derivative | -         | 344.0884 | 343.0884 | 209.1152, 285.0445                        | H            |
| 49 | 35.15 | Fatty compound        | C16H32O4  | 288.2272 | 287.2272 | -                                         | EA           |
| 50 | 41.35 | Fatty compound        | C18H30O4  | 310.2058 | 309.2058 | 171.1039, 277.1813, 291.1961              | H            |
| 51 | 46.00 | Unidentified          | C20H28O3  | 316.1989 | 315.1989 | 297.1862; 271.2084                        | H            |
| 52 | 46.57 | Unidentified          | C18H28O2  | 276.2017 | 275.2017 | 231.2102                                  | H            |
| 53 | 46.95 | Hexadecanedioic acid  | C16H30O4  | 286.2092 | 285.2092 | 108.7677, 223.2066, 267.1964              | H            |
| 54 | 47.24 | Fatty compound        | C18H30O3  | 294.2148 | 293.2148 | 275.2010; 224.1404; 195.1381              | H            |
| 55 | 48.33 | Unidentified          | C16H26O12 | 410.1337 | 409.1337 | 264.0462, 283.0310, 363.0917              | H            |
| 56 | 49.41 | Fatty compound        | C18H32O3  | 296.2284 | 295.2284 | 277.2165, 195.1378                        | M, Aq, H, EA |
| 57 | 50.92 | Fatty compound        | C18H32O4  | 312.1990 | 311.1990 | 153.1259, 185.1165, 249.2207,<br>293.3111 | H            |

M- methanolic, Aq- aqueous, H- hexane, EA- ethyl acetate. HHDP – hexahydroxydiphenyl, DHHDP – dehydrohexahydroxydiphenyl. The identification was based on the PubChem database and the following literature sources: [1-5]

## II. Figures

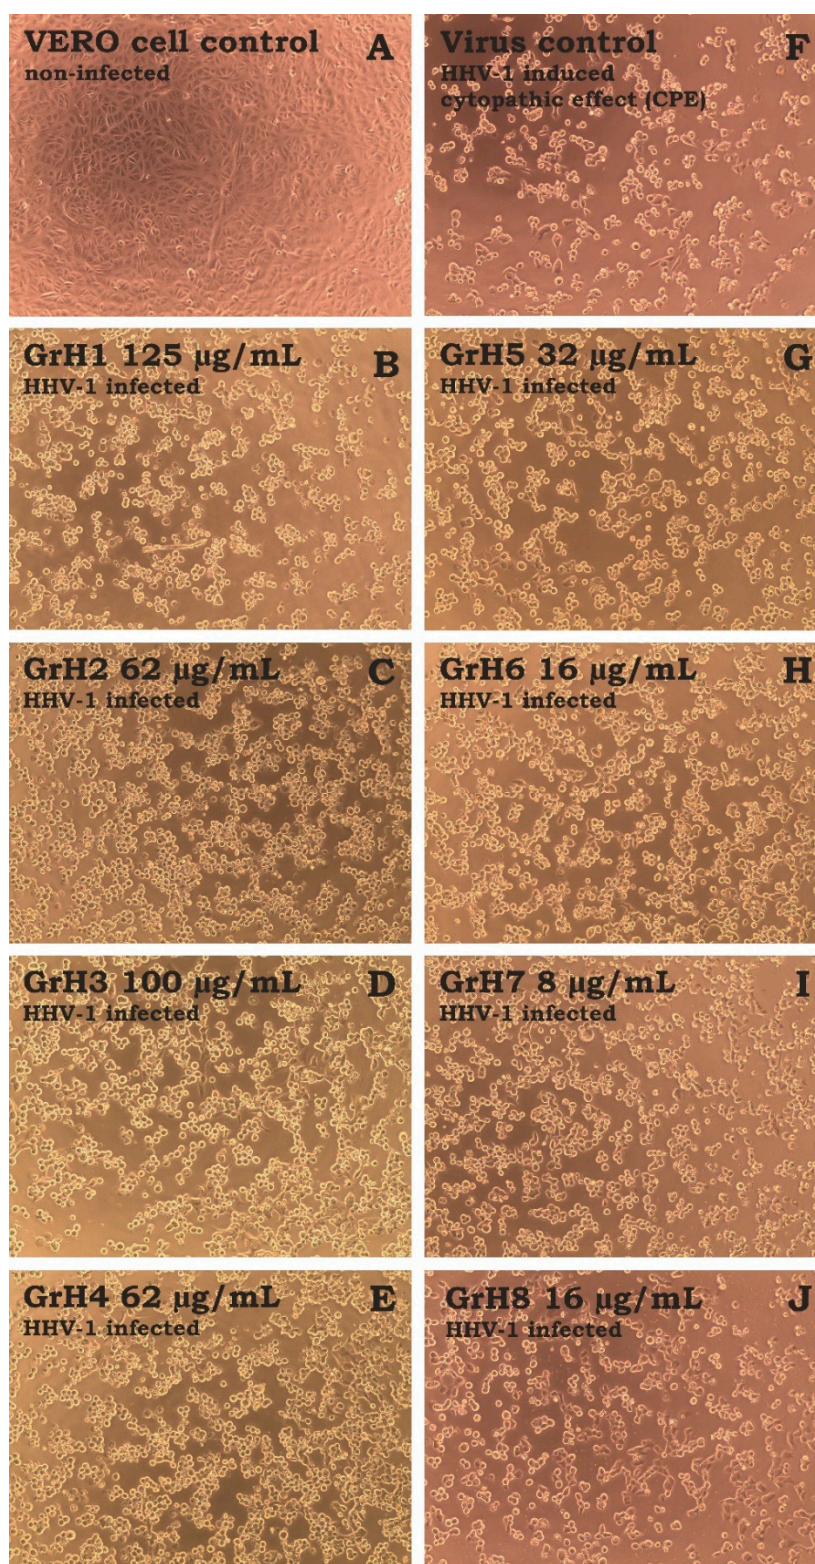

Figure S1. Influence of fractions obtained from *G. robertianum* hexane extract on the development of HHV-1-induced CPE. (A – VERO cell control; HHV-1 infected VERO cells treated with GrH1 125 µg/mL (B), GrH2 62 µg/mL (C), GrH3 100 µg/mL (D), GrH4 62 µg/mL (E), GrH5 32 µg/mL (G), GrH6 16 µg/mL (H), GrH7 8 µg/mL (I), GrH8 16 µg/mL (J); F – Virus control, HHV-1 infected and non-treated VERO cells)

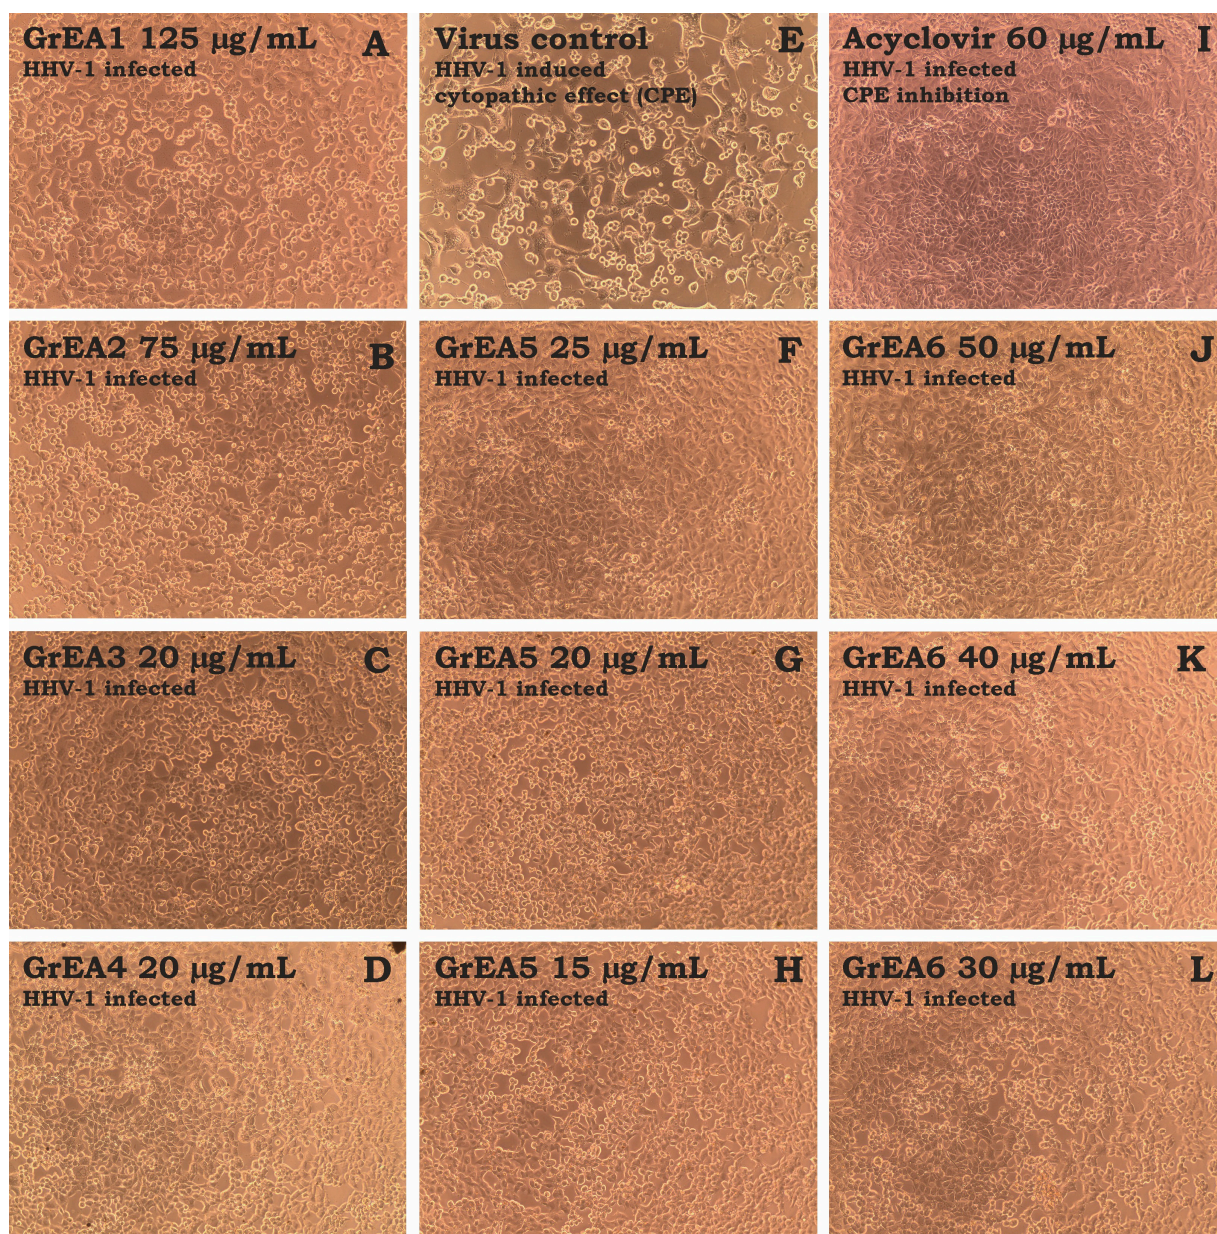

Figure S2. Inhibition of the CPE development by fractions obtained from *G. robertianum* ethyl acetate extract and acyclovir. (HHV-1 infected VERO cells treated with GrEA1 125  $\mu\text{g/mL}$  (A), GrEA2 75  $\mu\text{g/mL}$  (B), GrEA3 20  $\mu\text{g/mL}$  (C), GrEA4 20  $\mu\text{g/mL}$  (D), GrEA5 25  $\mu\text{g/mL}$  (F), GrEA5 20  $\mu\text{g/mL}$  (G), GrEA5 15  $\mu\text{g/mL}$  (H), Acyclovir 60  $\mu\text{g/mL}$  (I), GrEA6 50  $\mu\text{g/mL}$  (J), GrEA6 40  $\mu\text{g/mL}$  (K) GrEA6 30  $\mu\text{g/mL}$  L); E – Virus control, HHV-1 infected and non-treated VERO cells)

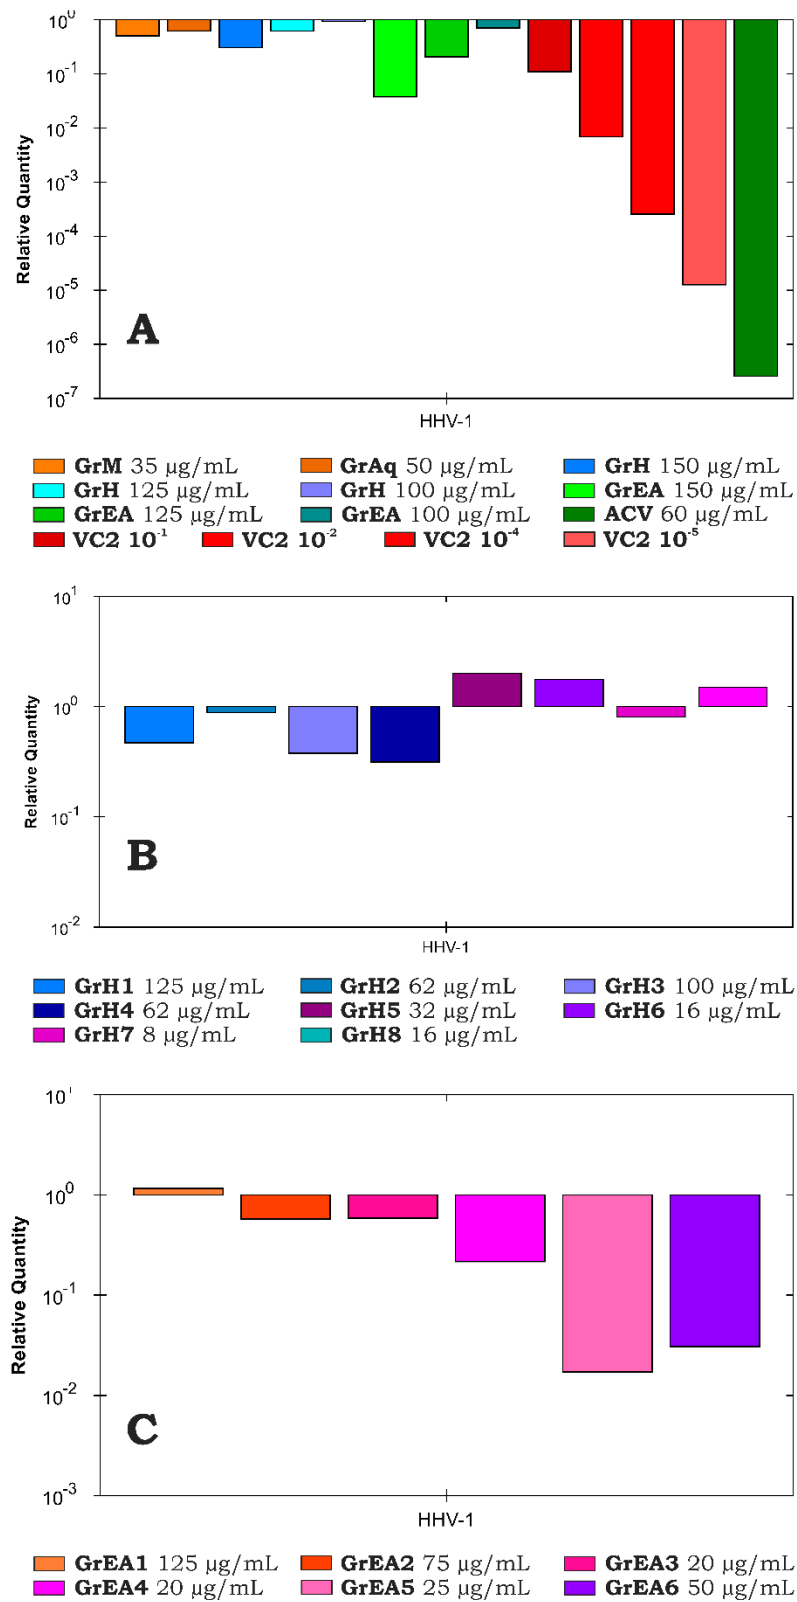

Figure S3. The assessment of HHV-1 viral load in the tested samples in relation to virus control based on the relative quantity ( $\Delta C_q$ ) method. (Reduction of HHV-1 viral load by: A – crude extracts, B – fractions from hexane extract, C – fractions from ethyl acetate extract)

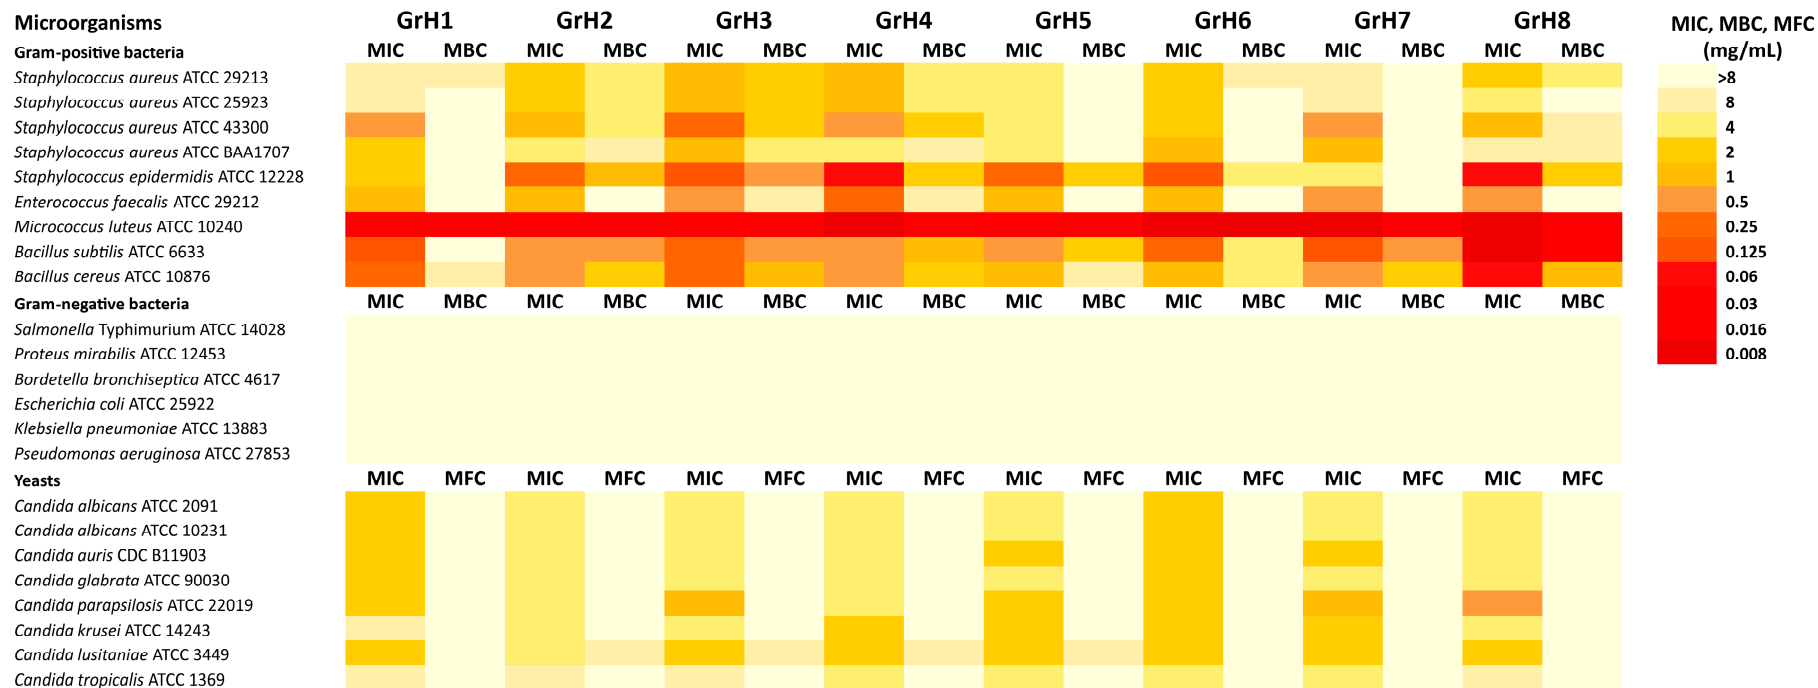

Figure S4. The antimicrobial potential of fractionations obtained from *G. robertianum* hexane extract (MIC – Minimum Inhibitory Concentration (mg/mL); MBC – Minimum Bactericidal Concentration (mg/mL); MFC – Minimum Fungicidal Concentration (mg/mL); reference antimicrobial substances MIC values: fluconazole 1 µg/mL for *Candida albicans* ATCC 10231, vancomycin 1 µg/mL for *Staphylococcus aureus* ATCC 29213, and ciprofloxacin 0.015 µg/mL for *Escherichia coli* ATCC 25922)

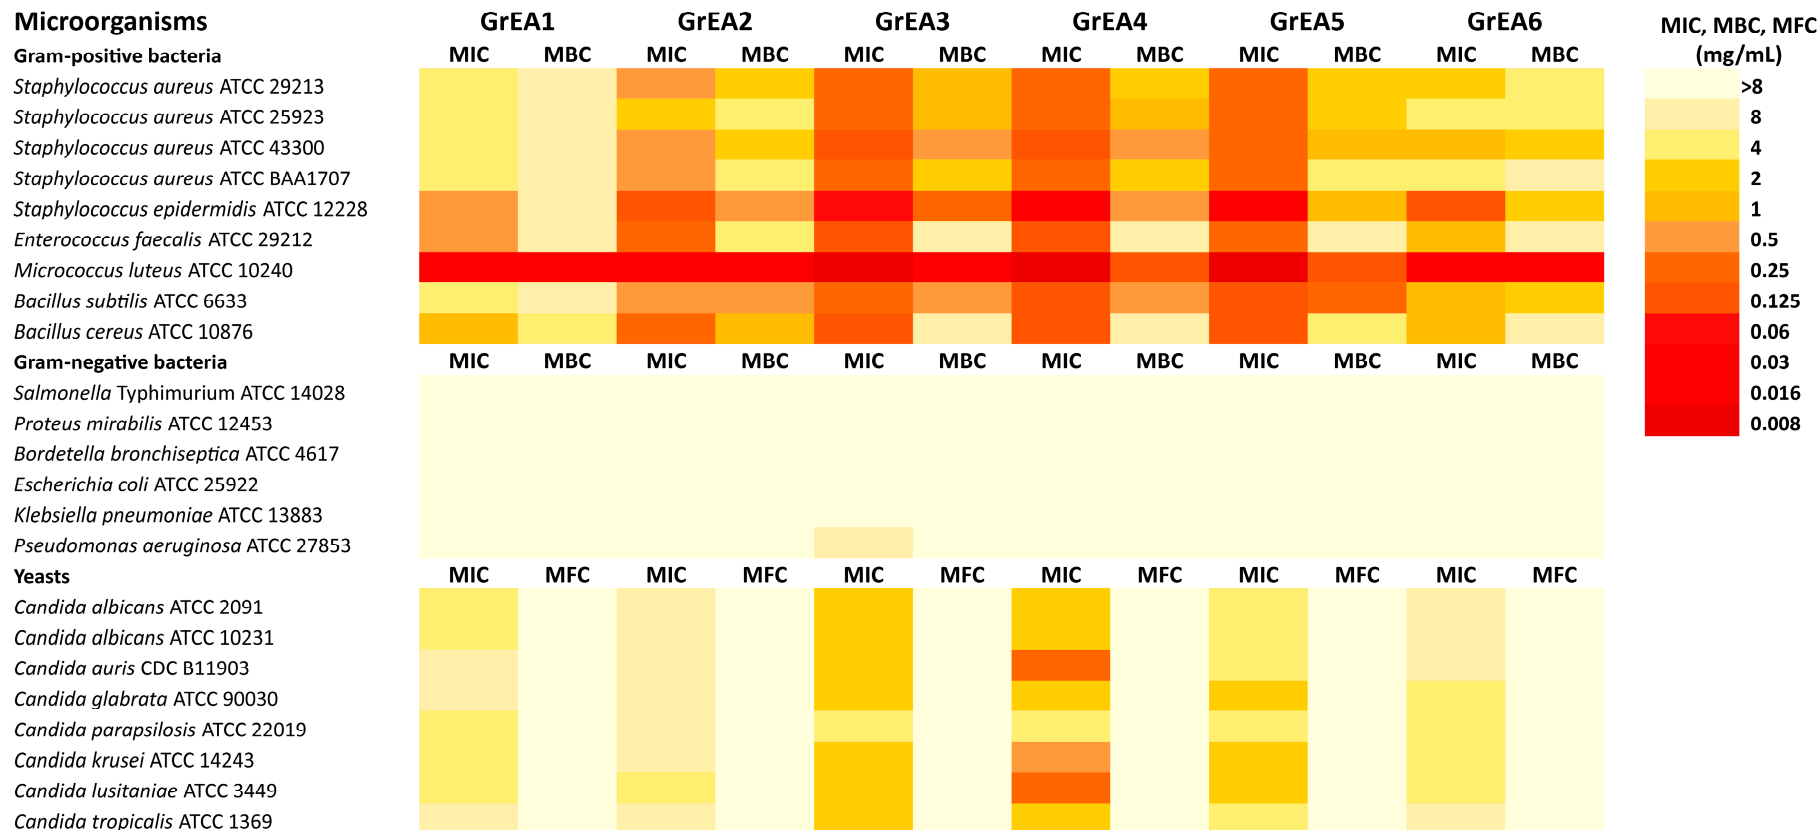

Figure S5. The antimicrobial activity of fractionations obtained from *G. robertianum* ethyl acetate extract (MIC – Minimum Inhibitory Concentration (mg/mL); MBC – Minimum Bactericidal Concentration (mg/mL); MFC – Minimum Fungicidal Concentration (mg/mL); reference antimicrobial substances MIC values: fluconazole 1 µg/mL for *Candida albicans* ATCC 10231, vancomycin 1 µg/mL for *Staphylococcus aureus* ATCC 29213, and ciprofloxacin 0.015 µg/mL for *Escherichia coli* ATCC 25922)

### ***III. Materials and methods***

#### ***Cell line maintenance and in vitro experiments***

The cytotoxicity of *G. robertianum* crude extracts (aqueous, methanolic, ethyl acetate and hexane), as well as fractions obtained from ethyl acetate extract (GrEA1-GrEA6) and hexane extract (GrH1-GrH8), was evaluated *in vitro* towards normal VERO (ATCC, CCL-81) cells and cancer-derived cell lines – FaDu (ATCC, HTB-43, human hypopharyngeal squamous cell carcinoma), Detroit 562 (human pharyngeal carcinoma, ATCC, CCL-138), and RKO (human colon cancer, ATCC, CRL-2577) using 3-(4,5-dimethylthiazol-2-yl)-2,5-diphenyltetrazolium bromide (MTT) based protocol.

Media used for *in vitro* culturing included Dulbecco Modified Eagle Medium (DMEM, Corning, Tewksbury, MA, USA) used for VERO cells and Modified Eagle Medium (MEM, Corning) used for cancer-derived cell lines. Cell media used in the experiments were supplemented with antibiotics (Penicillin-Streptomycin Solution, Corning) and fetal bovine serum (FBS, Corning) – 10% (cell passaging) and 2% (cell maintenance and experiments). Phosphate buffered saline (PBS) and trypsin were bought from Corning, whereas MTT (3-(4,5-dimethylthiazol-2-yl)-2,5-diphenyltetrazolium bromide) and DMSO (dimethyl sulfoxide) from Sigma (Sigma-Aldrich, St. Louis, MO, USA). Incubation was carried out in a 5% CO<sub>2</sub> atmosphere at 37°C (CO<sub>2</sub> incubator, Panasonic Healthcare Co., Tokyo, Japan).

Concentrations of cells for passaging were as follows: VERO –  $1.5 \times 10^5$  cells/mL, FaDu –  $2.5 \times 10^5$  cells/mL, Detroit 562 –  $2 \times 10^5$  cells/mL, and RKO –  $4 \times 10^5$  cells/mL.

Stock solutions of extracts were prepared by dissolving the extracts in cell culture grade DMSO (PanReac Applichem). Stock solutions of extracts were stored frozen (-23°C) until used.

#### ***Evaluation of cytotoxicity***

Cytotoxicity was tested using an MTT-based protocol following a previously described protocol [3]. Briefly, the cells were passaged into 96-well plates (Falcon, TC-treated, Corning) and, after overnight incubation, treated with serial dilutions of extract or fraction stock solutions for 72 h. Simultaneously, the cytotoxicity of DMSO in concentrations equal to those present in the dilutions of stock solutions was tested to exclude any effect on the assay. Afterwards, the media was removed, cells were washed with PBS, and 10% of MTT solution

(5 mg/mL) in cell media was added, and the incubation continued for the next 4 h. Subsequently, the SDS/DMF/PBS (14% SDS, 36% DMF, 50% PBS) solvent was used (100  $\mu$ L per well) to dissolve the precipitated formazan crystals, and the plates were left at 37°C overnight. Finally, the Synergy H1 Multi-Mode Microplate Reader (BioTek Instruments, Inc. Winooski, Vermont, USA) with Gen5 software (ver. 3.09.07; BioTek Instruments, Inc.) was used to measure the absorbance (540 and 620 nm).

### ***Evaluation of the antiviral properties***

The antiviral activity of *G. robertianum* extracts and fractions was tested against HHV-1 (ATCC, Cat. No. VR-260) propagated in the VERO cell line. The antiviral assays involved the influence of extracts on the formation of virus-induced cytopathic effect (CPE) and the semi-quantitative assessment of the viral load using Real-Time PCR.

### ***Evaluation of the influence on the virus-induced CPE***

The infectious titer of HHV-1 used in this study was  $5.5 \pm 0.25$  logCCID<sub>50</sub>/mL (CCID<sub>50</sub> – 50% cell culture infectious dose). Briefly, the VERO cells (monolayer) in 48-well plates (Falcon, clear flat bottom TC-treated, Corning) were treated (500  $\mu$ L/well) with HHV-1 suspension (100-fold CCID<sub>50</sub>/mL) in cell media and incubated for 1 hour, leaving at least two uninfected wells as VERO cell control. Afterwards, the media were removed, monolayers washed with PBS, and the non-toxic concentrations of extracts or fractions, the highest concentration not exceeding the CC<sub>10</sub> values, diluted in cell media were added. The non-infected VERO cells (cell control) and non-treated infected cells (virus control) wells were maintained in media containing 2% FBS. The incubation was conducted until cytopathic effect (CPE) was observed (inverted microscope CKX41, Olympus Corporation, Tokyo, Japan) in virus control, usually approx. 72h. Afterwards, the plates were observed for possible inhibition of CPE by tested extracts compared to the CPE in virus control, and the results were recorded. Lastly, the plates were thrice frozen (-72°C) and thawed; the samples were collected and stored at -72°C until DNA isolation [3].

### ***Real-Time PCR for HHV-1 viral load***

The DNA isolation was carried out using a commercially available kit (QIAamp DNA Mini Kit, Cat#51304, QIAGEN GmbH, Hilden, Germany) following the manufacturer's

instructions. The Real-Time PCR amplification was performed using SybrAdvantage qPCR Premix (Takara Bio Inc., Kusatsu, Shiga Prefecture, Japan) and primers (UL54F – 5' CGCCAAGAAAATTTTCATCGAG 3', UL54R – 5' ACATCTTGCACCACGCCAG 3') on the CFX96 thermal cycler (Bio-Rad Laboratories, Inc., California, USA). The amplification cycle parameters were as follows: initial activation (95°C, 20 secs); cycling (40 repeats: denaturation (95°C, 5 secs), annealing and synthesis (60°C, 30 secs), fluorescence acquisition); melting curve analysis (65-95°C). The HHV-1 viral load in the tested samples was assessed in relation to virus control based on the relative quantity ( $\Delta C_q$ ) method using CFX Manager™ Dx Software (Bio-Rad Laboratories).

### Supplementary material references

1. Catarino, M. D.; Silva, A. M. S.; Cruz, M. T.; Cardoso, S. M., Antioxidant and anti-inflammatory activities of *Geranium robertianum* L. decoctions. *Food & Function* **2017**, 8, (9), 3355-3365.
2. Graça, V. C.; Barros, L.; Calhelha, R. C.; Dias, M. I.; Ferreira, I. C. F. R.; Santos, P. F., Bio-guided fractionation of extracts of *Geranium robertianum* L.: Relationship between phenolic profile and biological activity. *Industrial Crops and Products* **2017**, 108, 543-552.
3. Świątek, Ł.; Sieniawska, E.; Sinan, K. I.; Maciejewska-Turska, M.; Boguszevska, A.; Polz-Dacewicz, M.; Senkardes, I.; Guler, G. O.; Bibi Sadeer, N.; Mahomoodally, M. F.; Zengin, G., LC-ESI-QTOF-MS/MS Analysis, Cytotoxic, Antiviral, Antioxidant, and Enzyme Inhibitory Properties of Four Extracts of *Geranium pyrenaicum* Burm. f.: A Good Gift from the Natural Treasure. *Int J Mol Sci* **2021**, 22, (14).
4. Sieniawska, E.; Świątek, Ł.; Sinan, K. I.; Zengin, G.; Boguszevska, A.; Polz-Dacewicz, M.; Bibi Sadeer, N.; Etienne, O. K.; Mahomoodally, M. F., Phytochemical Insights into *Ficus sur* Extracts and Their Biological Activity. *Molecules* **2022**, 27, (6).
5. Singh, A.; Bajpai, V.; Kumar, S.; Sharma, K. R.; Kumar, B., Profiling of Gallic and Ellagic Acid Derivatives in Different Plant Parts of *Terminalia arjuna* by HPLC-ESI-QTOF-MS/MS. *Natural Product Communications* **2016**, 11, (2).
